# Supplementary material for: Lithium-ion distribution and motion in two-dimensional covalent organic frameworks: the example of TAPB-PDA COF
Source: Royal Society of Chemistry journal article supplement (doi:10.1039/d2tc01076c), 2022-01-01
Supplement: d2tc01076c1.pdf [file d2tc01076c1.pdf]

## Supporting Information

### Lithium-Ion Distribution and Motion in Two-Dimensional Covalent Organic Frameworks: The Example of TAPB-PDA COF

*Hanyin Zhang<sup>ab</sup> and Haoyuan Li<sup>ac\*</sup>*

<sup>a</sup> Key Laboratory of Advanced Display and System Applications, Ministry of Education,  
Shanghai University, Shanghai 200072, China

<sup>b</sup> School of Materials Science and Engineering, Guangdong Provincial Key Laboratory of  
Advanced Energy Storage Materials, South China University of Technology, Guangzhou  
510640, China

<sup>c</sup> School of Microelectronics, Shanghai University, Shanghai 201800, China

\*Corresponding author: [lihaoyuan@shu.edu.cn](mailto:lihaoyuan@shu.edu.cn)

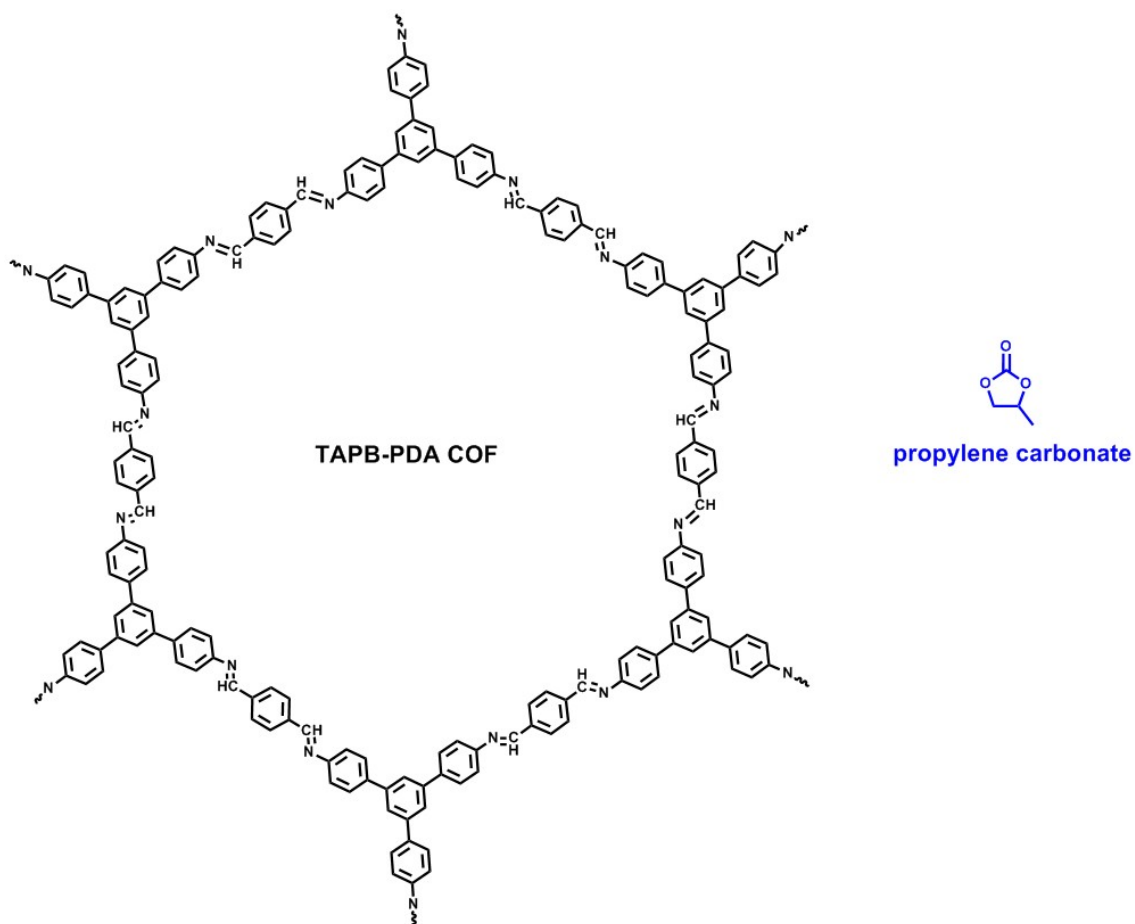

**Figure S1.** Chemical structures of TAPB-PDA COF and propylene carbonate.

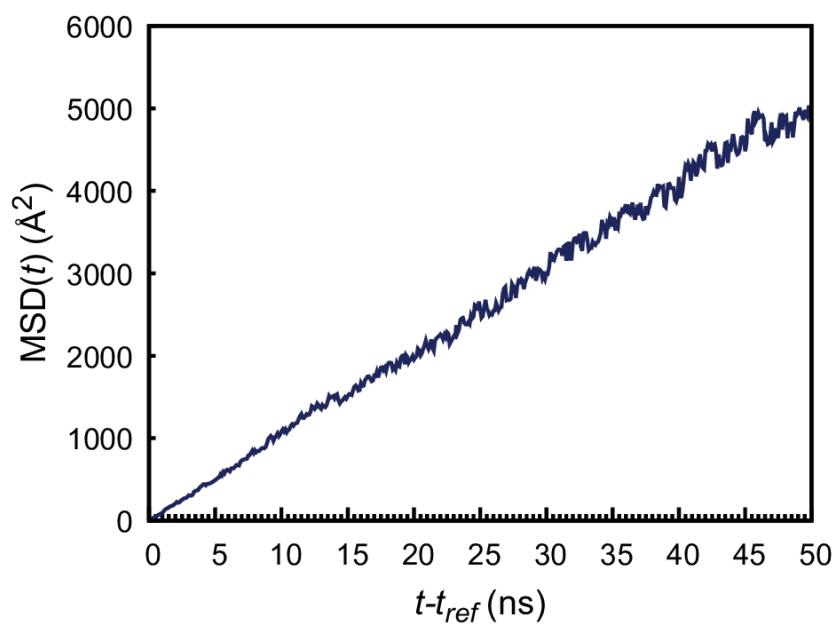

**Figure S2.** Mean square deviation of  $\text{Li}^+$  in PC solution at 1 M  $\text{LiClO}_4$ .

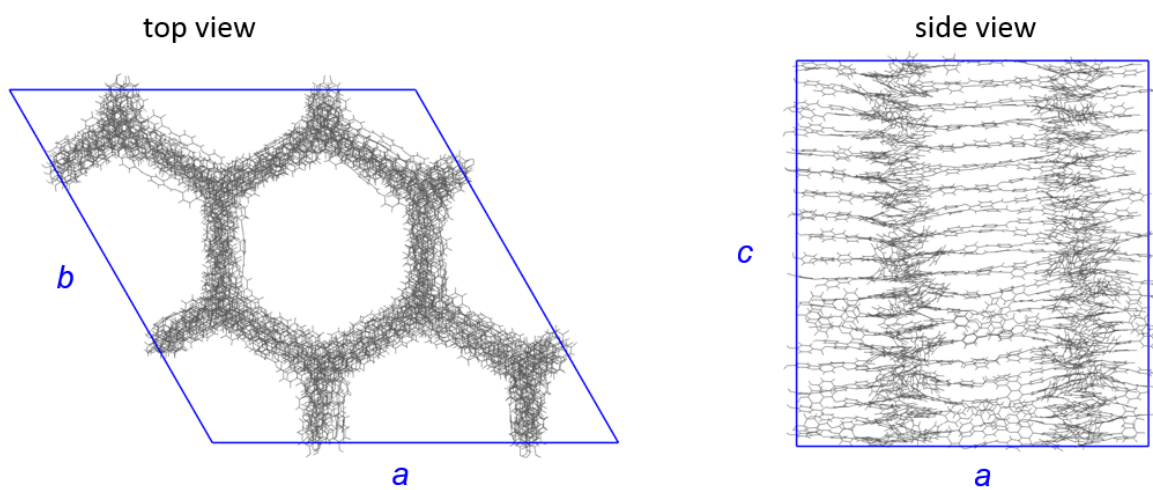

**Figure S3.** A representative snapshot of simulated TAPB-PDA COF without  $\text{LiClO}_4$ .

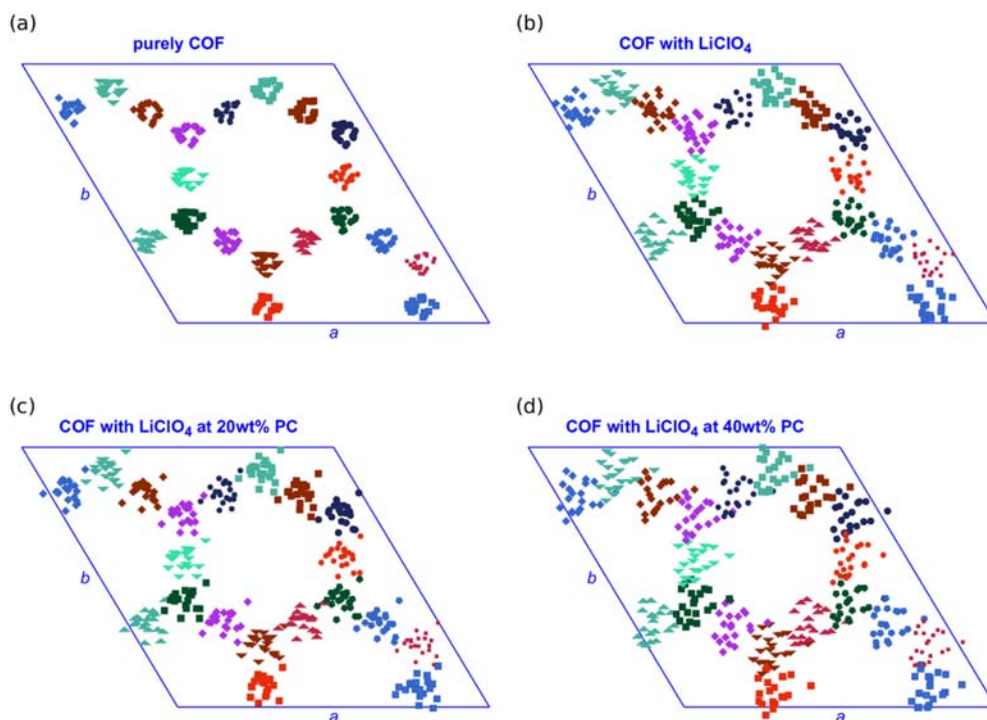

**Figure S4.** Projection of the coordinates of monomer units of the simulated COF onto the *ab*-plane for different systems: (a) purely TAPB-PDA COF without LiClO<sub>4</sub> and TAPB-PDA COF mixed with LiClO<sub>4</sub> at (b) 0wt%, (c) 20wt% and (d) 40wt% PC. Dots of the same color and shape represent the monomer units initially stacked at the same location in the *ab*-plane.

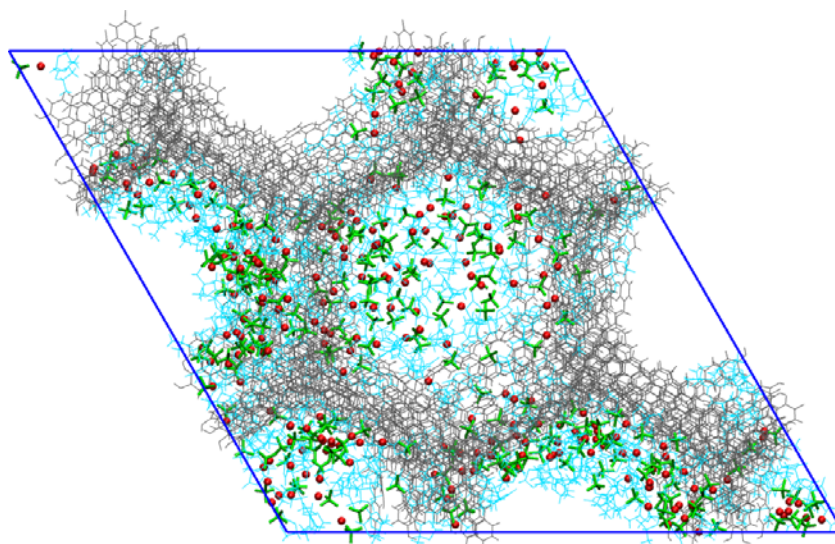

**Figure S5.** Top view at 200 ns for TAPB-PDA COF mixed with LiClO<sub>4</sub> at 30wt% PC. Red spheres, green rods and cyan lines represent Li<sup>+</sup>, ClO<sub>4</sub><sup>-</sup> and PC molecules, respectively.

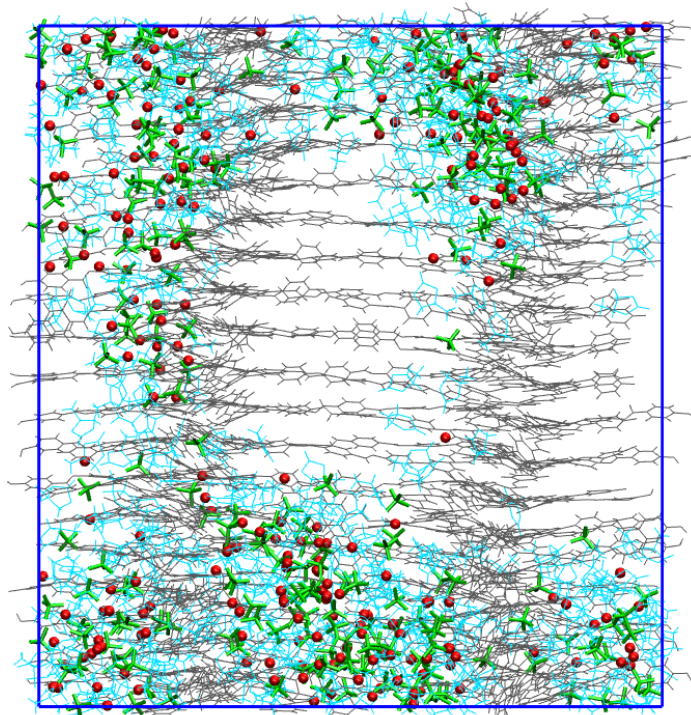

**Figure S6.** Side view at 200 ns for TAPB-PDA COF mixed with LiClO<sub>4</sub> at 30wt% PC. Red spheres, green rods and cyan lines represent Li<sup>+</sup>, ClO<sub>4</sub><sup>-</sup> and PC molecules, respectively.

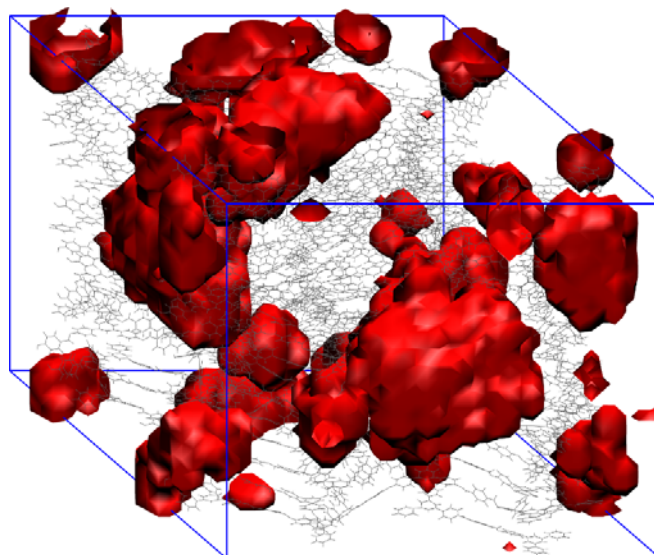

**Figure S7.** Illustrations of the occupations of Li<sup>+</sup> at 10wt% PC. The isosurfaces denote the boundaries of a 99% probability of presence in the last 100 ns-trajectory.



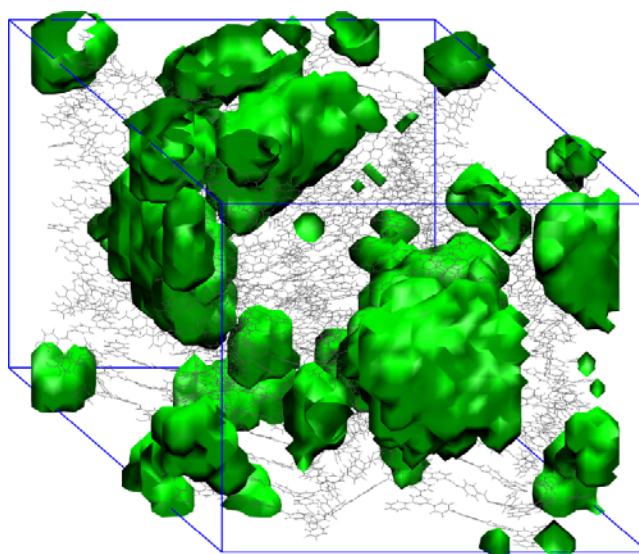

**Figure S8.** Illustrations of the occupations of  $\text{ClO}_4^-$  at 10wt% PC. The isosurfaces denote the boundaries of a 99% probability of presence in the last 100 ns-trajectory.

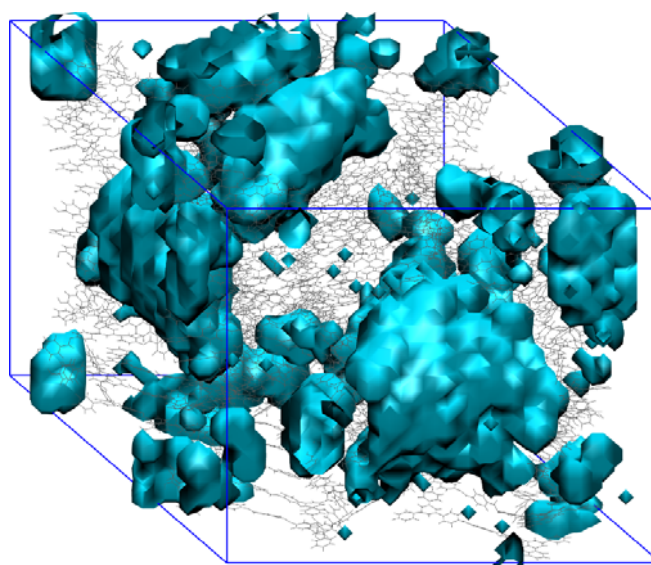

**Figure S9.** Illustrations of the occupations of PC at 10wt% PC. The isosurfaces denote the boundaries of a 99% probability of presence in the last 100 ns-trajectory.

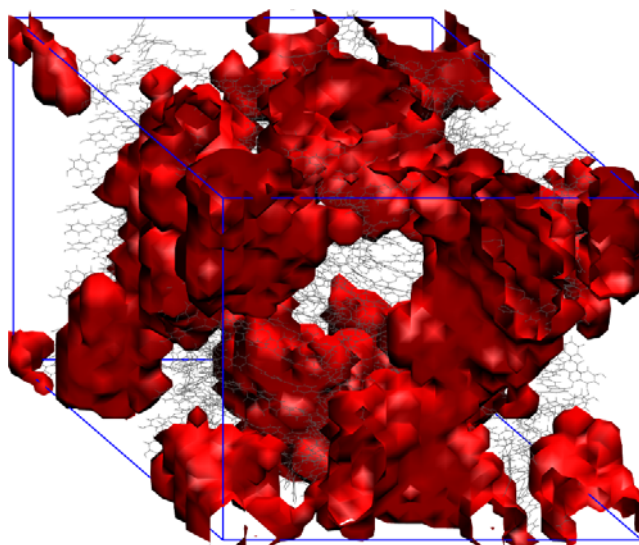

**Figure S10.** Illustrations of the occupations of  $\text{Li}^+$  at 30wt% PC. The isosurfaces denote the boundaries of a 99% probability of presence in the last 100 ns-trajectory.

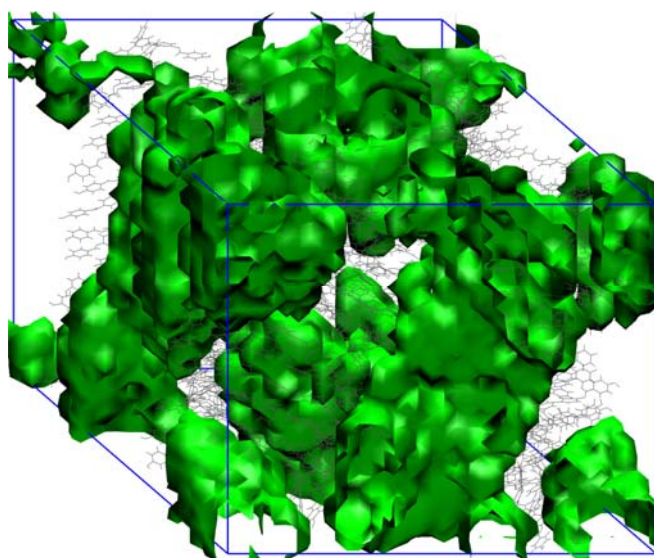

**Figure S11.** Illustrations of the occupations of  $\text{ClO}_4^-$  at 30wt% PC. The isosurfaces denote the boundaries of a 99% probability of presence in the last 100 ns-trajectory.

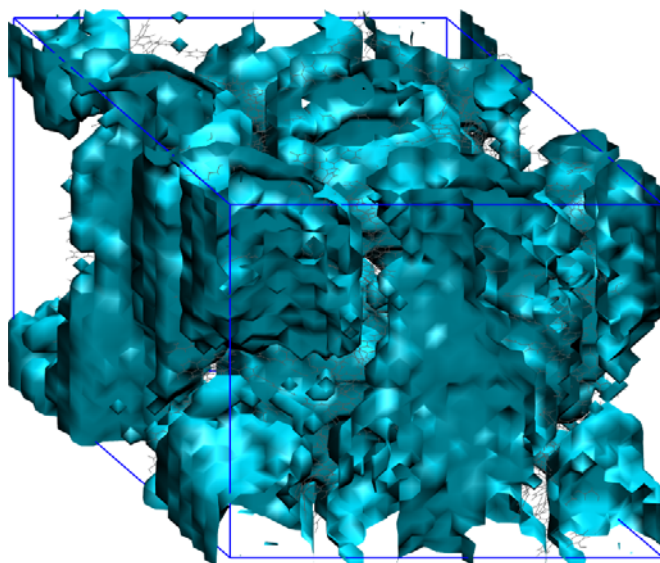

**Figure S12.** Illustrations of the occupations of PC at 30wt% PC. The isosurfaces denote the boundaries of a 99% probability of presence in the last 100 ns-trajectory.
